# Supplementary material for: Cystatin F is a cathepsin C-directed protease inhibitor regulated by proteolysis
Source: PubMed Central journal article supplement — EMBO J. 2008 Feb 6;27(3):499–508. doi: 10.1038/sj.emboj.7601979 (PMC2241651; doi:10.1038/sj.emboj.7601979), 2008-02-06
Supplement: 7601979s1.pdf [file 7601979s1.pdf]

**Mature cystatin F (residues 20 -144). Mol Wt 14543.74 Da**

GPSPDTCSDLNSRVKPGFPKTIK TNDPGVLOAAR YSVEKFNNCTNDMFLFK ESRITR ALVQIVK  
GLKYMLEVEIGR TTCKKNQHLR LDDCDFQTNHTLK QTLSCYSEVVVPWLOHFEVPVLR CH

**Cathepsin C HEAVY CHAIN (residues 231-394) Mol Wt 18472.88 Da**

LPTSVDWR NVHGINFVSPVR NOASCGSCYSFASMGMLEAR IRILTNNSTPILSPQEV  
VSCSQYAQGCEGGFPYLIAGK YAQDFGLVEEACFPYTGTDSPCK MKEDCFR YYSSEYHYVGGFYGGCNEALMK  
LELVHHGPMVAFAFEVYDDFLHYK KGIYHHTGLR

**Cathepsin C Light Chain (residues 395-463) Mol Wt 7577.49 Da**

DPFNPFEELTNHAVLLVGYGTDSASGMDYWIWK NSWGTGWGENGYFR IR RGTDECAIESIAVAATPIPKL
