# Supplementary figures and images for: Cystatin F is a cathepsin C-directed protease inhibitor regulated by proteolysis
Source: PubMed Central journal article supplement — EMBO J. 2008 Feb 6;27(3):499–508. doi: 10.1038/sj.emboj.7601979 (PMC2241651; doi:10.1038/sj.emboj.7601979), 2008-02-06

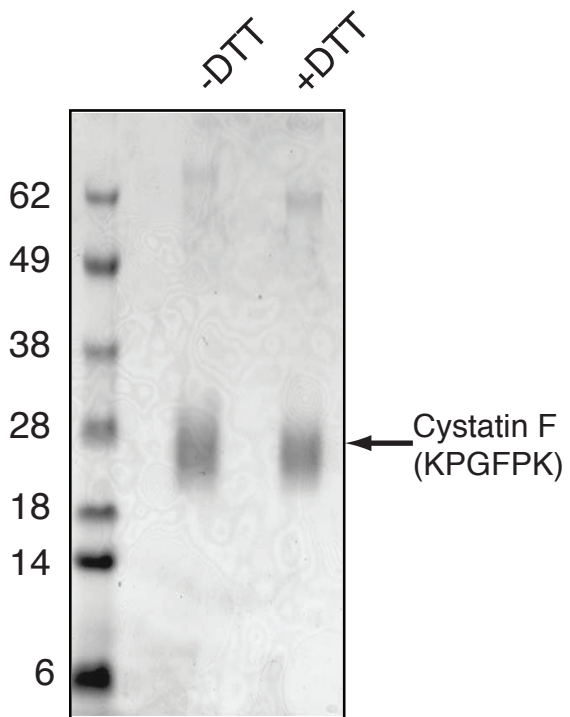

Supplement: 7601979s2.pdf [file 7601979s2.pdf]

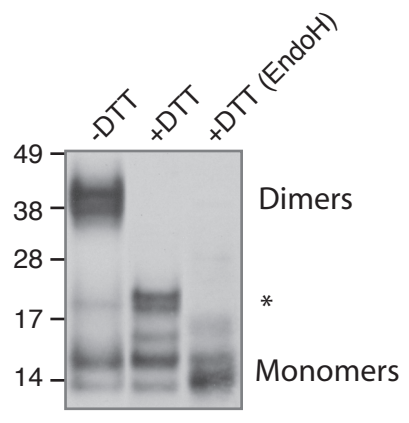

Supplement: 7601979s3.pdf [file 7601979s3.pdf]

**A**

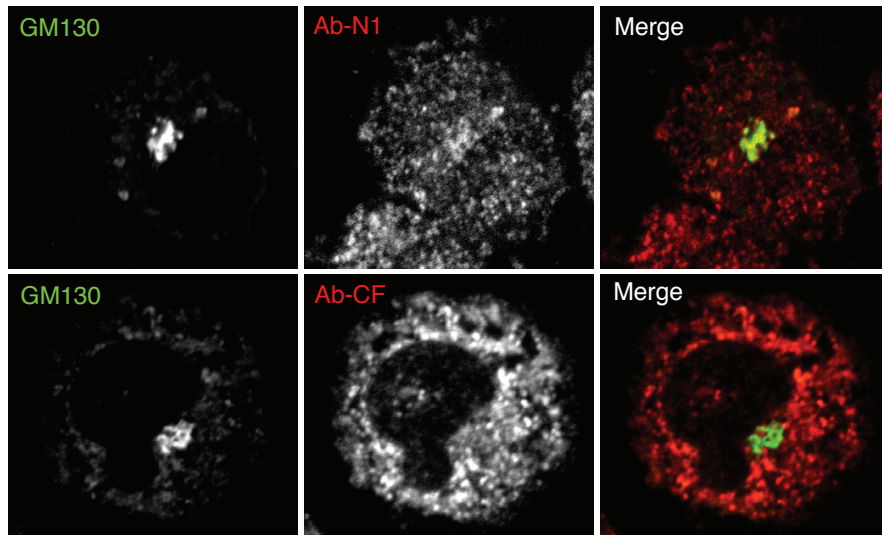

**B**

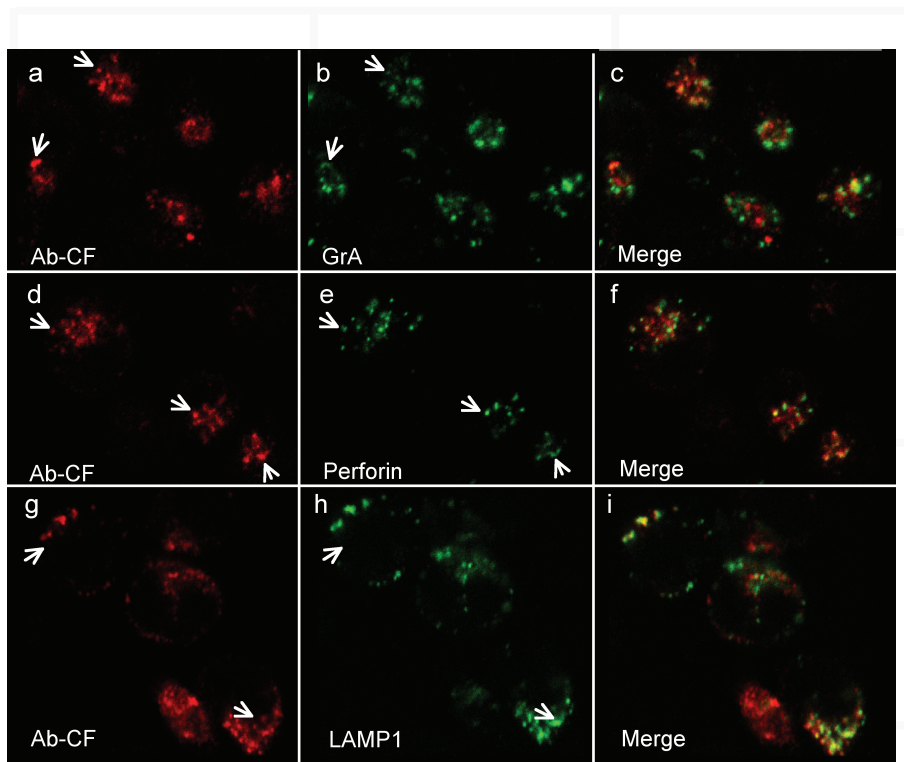

Supplement: 7601979s4.pdf [file 7601979s4.pdf]

**A**

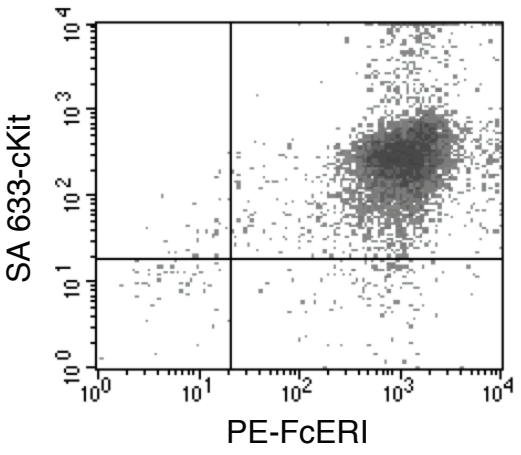

**B**

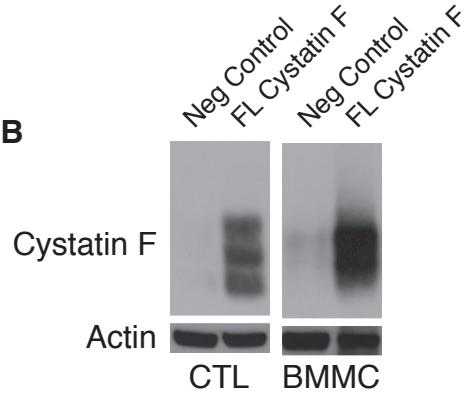

**C**

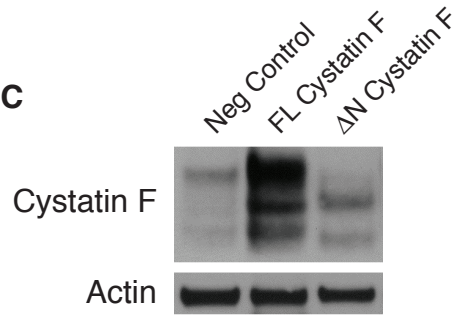

Supplement: 7601979s5.pdf [file 7601979s5.pdf]
